# Supplementary material for: Foxn1-β5t transcriptional axis controls CD8+ T-cell production in the thymus
Source: PubMed Central journal article supplement (PMC5309848; doi:10.1038/ncomms14419), 2017-02-08
Supplement: ncomms14419-s1.pdf [file ncomms14419-s1.pdf]

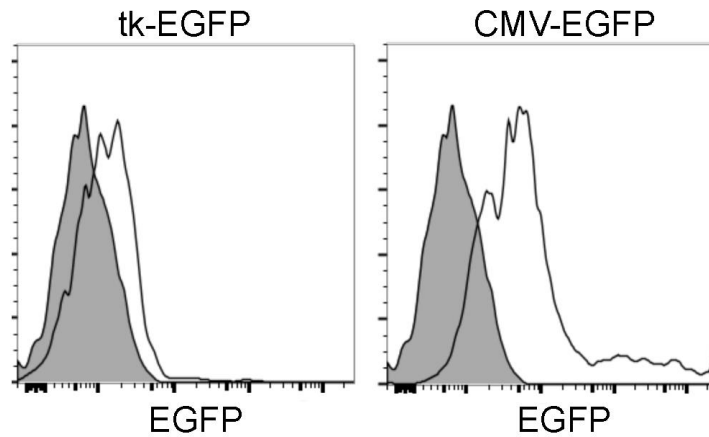

**Supplementary Figure 1. EGFP expression by two different promoters.**

Representative profiles ( $n = 3$ ) of EGFP expression in HEK293T cells transfected with EGFP-expressing plasmid driven by herpes simplex virus thymidine kinase gene promoter (tk-EGFP, left panel) or cytomegalovirus immediate early gene promoter (CMV-EGFP, right panel). Shaded histograms indicate EGFP expression in control cells.

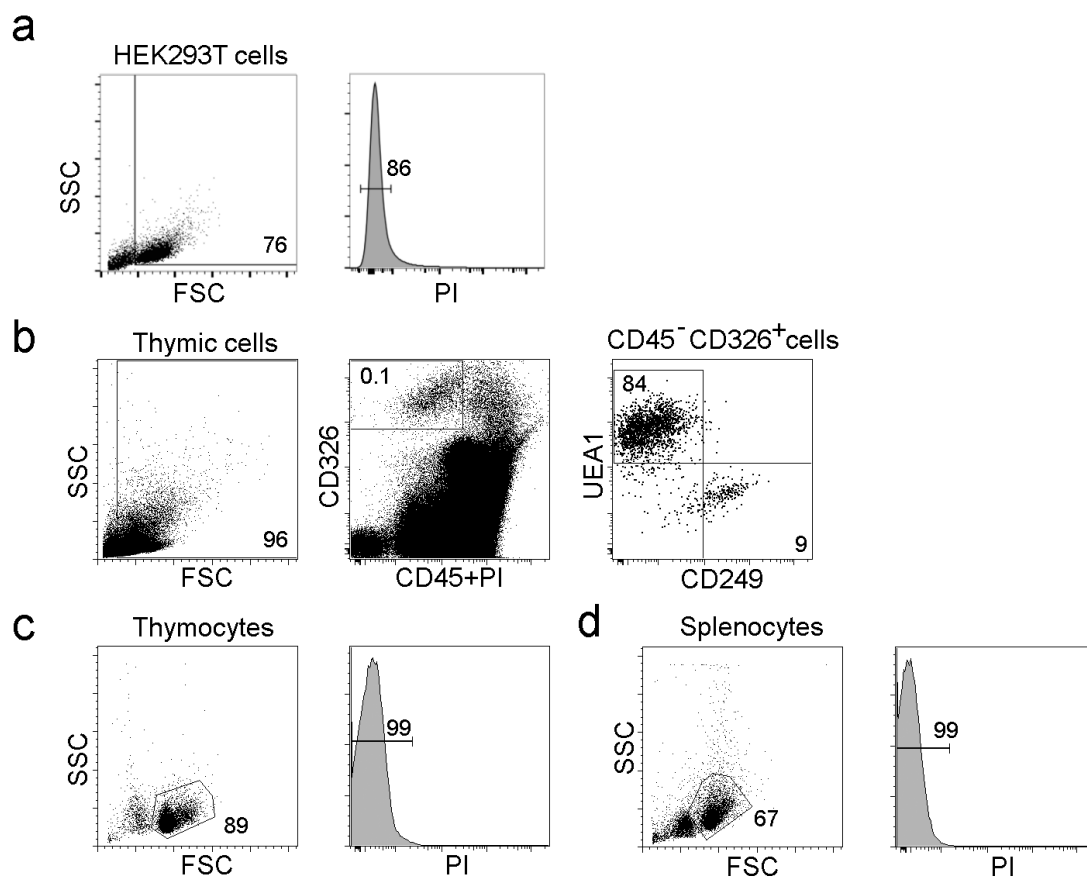

**Supplementary Figure 2. Flow cytometry strategies.** Dot plots and histograms show the representative flow cytometry profiles for the gating for (a) viable HEK293T cells, (b) liberase-digested viable CD249<sup>+</sup>UEA1<sup>-</sup>CD45<sup>-</sup>CD326<sup>+</sup> cortical thymic epithelial cells and CD249<sup>-</sup>UEA1<sup>+</sup>CD45<sup>-</sup>CD326<sup>+</sup> medullary thymic epithelial cells, (c) viable thymocytes, and (d) viable splenocytes. FSC, forward scatter; SSC, side scatter; PI, propidium iodide.

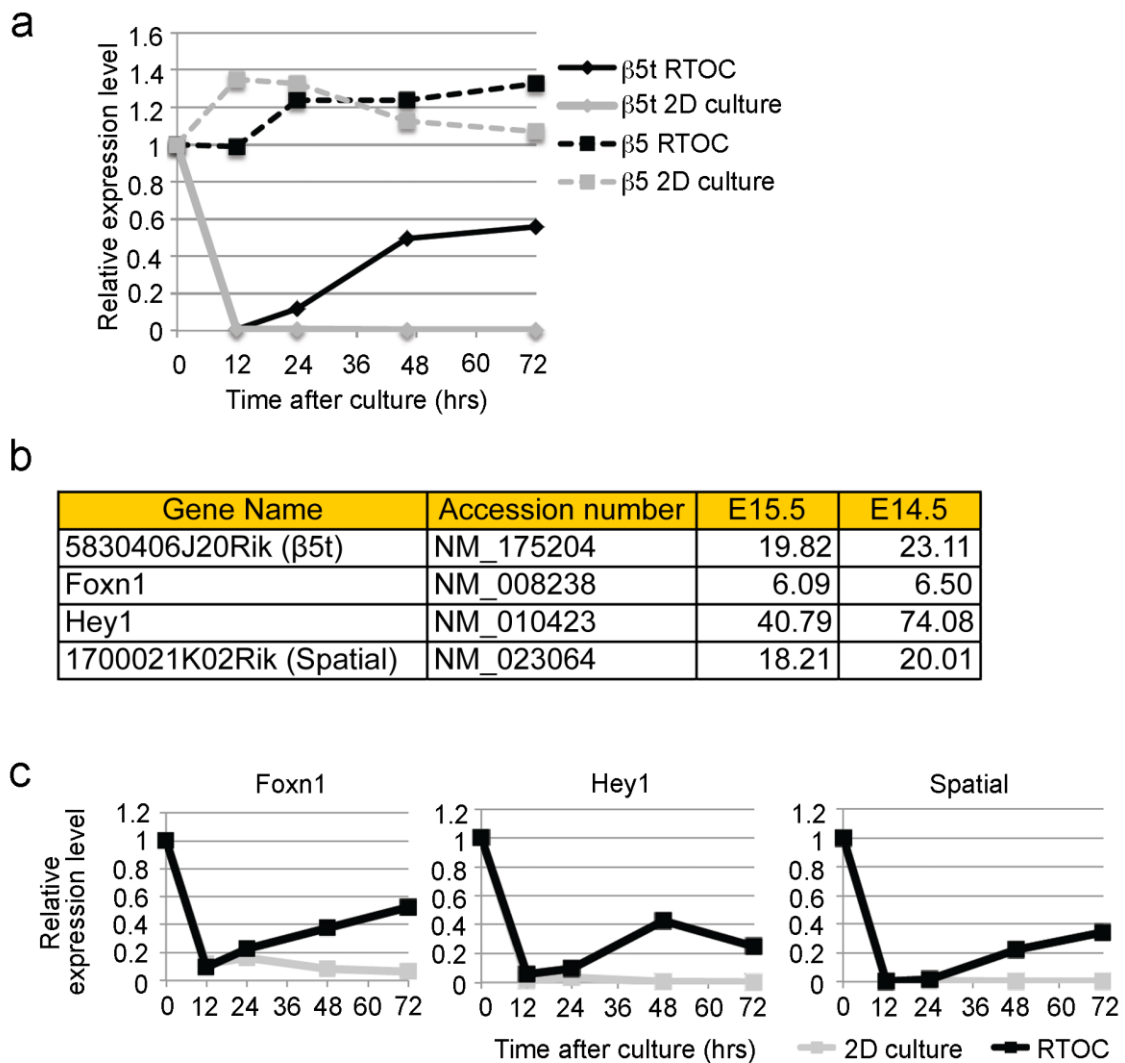

**Supplementary Figure 3. Kinetics of gene expression in RTOC and 2D culture.** (a) Relative mRNA expression of  $\beta 5t$  (solid lines) and  $\beta 5$  (dashed lines) in thymic stromal cells during RTOC (black lines) and 2D culture (gray lines). The expression level at 0 hr (just after disperse treatment) was set as 1. (b) Ratio of  $\beta 5t$ , *Foxn1*, *Hey1*, and *Spatial* mRNA expression in RTOC versus 2D culture in microarray analysis of thymic stromal cells. (c) Relative mRNA expression of *Foxn1*, *Hey1*, and *Spatial* in thymic stromal cells during RTOC (black lines) and 2D culture (gray lines).

|              | sequence                        | location                            | homology to on-target | score |
|--------------|---------------------------------|-------------------------------------|-----------------------|-------|
| on-target    | <u>GGAGGACGCTGTGGAGAAGCTGG</u>  | chr14, $\beta$ 5t, 5'genomic region | 100%                  |       |
| off-target1  | <u>AGAGGAAGCTGTGGAGAAGCAGG</u>  | chr14, Sacs, intron2                | 90%                   | 4.6   |
| off-target2  | <u>GGGGGAAGCTGTGGAGAAGCTGG</u>  | chr2, Ryr3, intron73                | 90%                   | 4.0   |
| off-target3  | <u>GGGGGACCCAGTGGAGAAGCTGG</u>  | chr18, Zfp608, 3'genomic region     | 85%                   | 2.4   |
| off-target4  | <u>AGAGGACGGAGTGGAGAAGCAAG</u>  | chr4, Padi4, intron10               | 85%                   | 1.5   |
| off-target5  | <u>AGTGGTCGCTGTGGAGAAGCAGG</u>  | chr17, Cyp1b1, intron1              | 85%                   | 1.5   |
| off-target6  | <u>GGTGAACGCTGAGGAGAAGCAGG</u>  | chr4, Runx3, 5'genomic region       | 85%                   | 1.3   |
| off-target7  | <u>GCAGGACACTGTGAGCAGCAGG</u>   | chr8, Agpat5, 5'genomic region      | 85%                   | 1.3   |
| off-target8  | <u>GGAGAACACTGGGGAGAAGCCAG</u>  | chr5, 2900026A02Rik, exon10         | 85%                   | 1.3   |
| off-target9  | <u>GGAGGACCCAGAGGAGAAGCTGG</u>  | chr12, Nr3c1, 5'genomic region      | 85%                   | 1.1   |
| off-target10 | <u>TGAGGTGCTGTGGAGAAGCAGG</u>   | chr1, Esrrg, 5'genomic region       | 85%                   | 1.1   |
| off-target11 | <u>GGAGAACCCTGTGGAGAACCCTGG</u> | chr7, 9030624J02Rik, intron9        | 85%                   | 1.0   |
| off-target12 | <u>GGCGGAAGCTGTGGAGAAGGAGG</u>  | chr8, Maf, 5'genomic region         | 85%                   | 1.0   |
| off-target13 | <u>GGGGCACACAGTGGAGAAGCCAG</u>  | chr15, Prlr, 5'genomic region       | 80%                   | 1.3   |
| off-target14 | <u>TGAGAACCAGTGGAGAAGCAGG</u>   | chr2, Ssfa2, 3'genimoc region       | 80%                   | 1.3   |
| off-target15 | <u>TCAAGAGGCTGTGGAGAAGCAAG</u>  | chr1, Gaptc2, 3'genomic region      | 80%                   | 0.9   |

|             |                                 |              |                          |              |                         |
|-------------|---------------------------------|--------------|--------------------------|--------------|-------------------------|
| on-target   | GGAGGAC <u>GCTGTGGAGAAGCTGG</u> | off-target6  | GGTGAACGCTGAGGAGAAGCAGG  | off-target12 | GGCGGAAGCTGTGGAGAAGGAGG |
| mouse       | ***** * *                       | mouse        | *****                    | mouse        | *****                   |
| genome      | GGAGGAC <u>ACTATGGAGAAGCTGG</u> | genome       | GGTGAACGCTGAGGAGAAGCAGG  | genome       | GGCGGAAGCTGTGGAGAAGGAGG |
| off-target1 | AGAGGAAGCTGTGGAGAAGCAGG         | off-target7  | GCAGGACACTGTGGAGCAGCAGG  | off-target13 | GGGGCACACAGTGGAGAAGCCAG |
| mouse       | *****                           | mouse        | *****                    | mouse        | *****                   |
| genome      | AGAGGAAGCTGTGGAGAAGCAGG         | genome       | GCAGGACACTGTGGAGCAGCAGG  | genome       | GGGGCACACAGTGGAGAAGCCAG |
| off-target2 | GGGGGAAGCTGTGGAGAAGCTGG         | off-target8  | GGAGAACACTGGGGAGAAGCCAG  | off-target14 | TGAGAACCAGTGGAGAAGCAGG  |
| mouse       | *****                           | mouse        | *****                    | mouse        | *****                   |
| genome      | GGGGGAAGCTGTGGAGAAGCTGG         | genome       | GGAGAACACTGGGGAGAAGCCAG  | genome       | TGAGAACCAGTGGAGAAGCAGG  |
| off-target3 | GGGGGACCCAGTGGAGAAGCTGG         | off-target9  | GGAGGACCCAGAGGAGAAGCTGG  | off-target15 | TCAAGAGGCTGTGGAGAAGCAAG |
| mouse       | *****                           | mouse        | *****                    | mouse        | *****                   |
| genome      | GGGGGACCCAGTGGAGAAGCTGG         | genome       | GGAGGACCCAGAGGAGAAGCTGG  | genome       | TCAAGAGGCTGTGGAGAAGCAAG |
| off-target4 | AGAGGACGGAGTGGAGAAGCAAG         | off-target10 | TGAGGTGCTGTGGAGAAGCAGG   |              |                         |
| mouse       | *****                           | mouse        | *****                    |              |                         |
| genome      | AGAGGACGGAGTGGAGAAGCAAG         | genome       | TGAGGTGCTGTGGAGAAGCAGG   |              |                         |
| off-target5 | AGTGGTCGCTGTGGAGAAGCAGG         | off-target11 | GGAGAACCCTGTGGAGAACCCTGG |              |                         |
| mouse       | *****                           | mouse        | *****                    |              |                         |
| genome      | AGTGGTCGCTGTGGAGAAGCAGG         | genome       | GGAGAACCCTGTGGAGAACCCTGG |              |                         |

**Supplementary Figure 4. No detection of off-target mutations in site #13 mutant mice.** On-target site #13 and fifteen off-target sites with the high sequence match (80% to 90% of the similarity excluding the protospacer adjacent motif) to the on-target site (top) were sequenced in the genome of mutant mice (bottom). Underlines indicate the protospacer adjacent motif sequence. No off-target mutations were detected in our site #13 mutant mice.

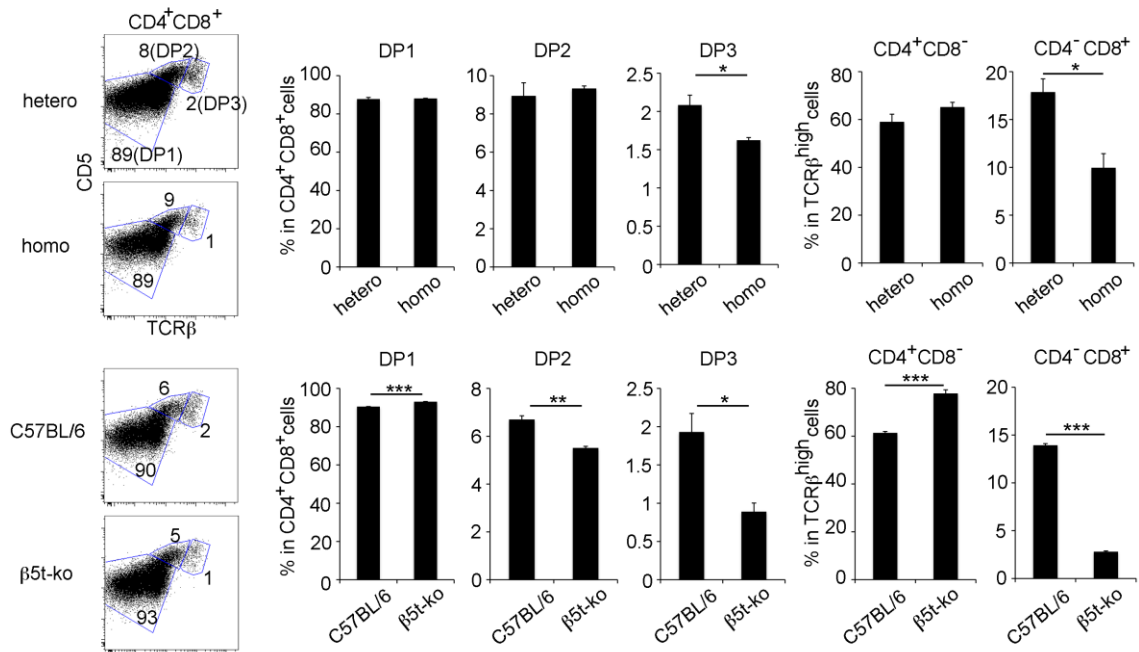

**Supplementary Figure 5. Diminished DP3 thymocytes in site #13 mutant mice.**

Flow cytometric analysis of thymocytes from 5-week-old mice. Shown are dot plots for TCRβ and CD5 expression in CD4<sup>+</sup>CD8<sup>+</sup> cells. Boxes indicate DP1 (TCR<sup>low</sup> CD5<sup>low</sup>), DP2 (TCR<sup>intermediate</sup> CD5<sup>high</sup>) and DP3 (TCR<sup>high</sup> CD5<sup>intermediate</sup>) subpopulations. Numbers in dot plots indicate frequency of cells within indicated area. Bar graphs show the frequency (means and s.e.m., n = 3) of indicated thymocyte populations. \*, P<0.05; \*\*, P<0.01; \*\*\*, P<0.001. Statistic analyses were performed by student's *t*-test.

**Supplementary Table 1. Nucleotide sequences of site #8 and site #13 in different species.** Letters in red indicate the Foxn1-binding invariant core ACGC tetranucleotide.

|            | site #8              | site #13             |
|------------|----------------------|----------------------|
| Mouse      | GCTT <b>ACGC</b> TTT | GAGG <b>ACGC</b> TGT |
| Human      | TAAC <b>ACTC</b> ACC | AGGG <b>ACGC</b> TAC |
| Chimpanzee | GCTG <b>AGGC</b> AGG | AGGG <b>ACGC</b> TAC |
| Dog        | GTAT <b>ATCAT</b> CT | AGAG <b>ACGC</b> TAA |
| Rat        | GCAT <b>ACTC</b> TTT | GAGG <b>ACGC</b> TGT |
| Bat        | TATC <b>ACTT</b> ACC | AAGG <b>ACGC</b> TAA |
| Elephant   | CCTACTCATAA          | AGGG <b>ACGC</b> TAG |
| Horse      | GGTC <b>A</b> AAGGGT | AGGG <b>ACGC</b> TAA |
